# Supplementary material
Source: publisher figshare collection journal article supplement (https://karger.figshare.com/ndownloader/files/27948777)
Supplement: Supplementary file 1 [file 27948777]

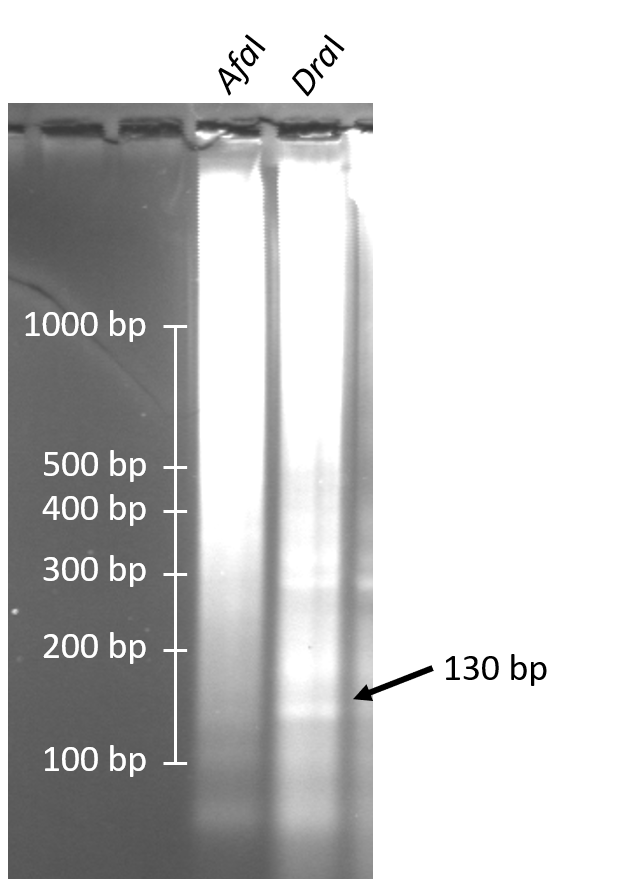


**Supplementary Fig. S1.** Isolation of repetitive DNA sequences with restriction enzymes *Afa* I and *Dra* I in the genomic DNA of group A dojo loach. Arrow indicates a satellite band of approximately 130 bp.
